# Supplementary material for: Treatment against coccidiosis in Norwegian lambs and potential risk factors for development of anticoccidial resistance—a questionnaire-based study
Source: PubMed Central journal article supplement (PMC5360830; doi:10.1007/s00436-017-5400-7), 2017-02-11
Supplement: 436_2017_5400_MOESM1_ESM.pdf [file 436_2017_5400_MOESM1_ESM.pdf]

# **Treatment against coccidiosis in Norwegian lambs and potential risk factors for development of anticoccidial resistance – a questionnaire-based study**

Parasitology Research

Ane Odden, Heidi L. Enemark, Lucy J. Robertson, Antonio Ruiz, Lisbeth Hektoen, Snorre Stuen

Corresponding author: Ane Odden, Norwegian University of Life Sciences, Faculty of Veterinary Medicine,  
Department of Production Animal Clinical Sciences, Kyrkjevegen 332/334, N-4325 Sandnes, Norway  
[ane.odden@nmbu.no](mailto:ane.odden@nmbu.no)

## Questionnaire regarding coccidiosis

Dear sheep farmer!

This questionnaire is a part of a three-year project to investigate how Norwegian sheep farmers are treating for coccidiosis, and whether the treatment is effective. The reason for the project is that there have been several reports of reduced efficacy of the anticoccidials being used.

Coccidiosis can be suspected when young lambs, often at spring pasture, have diarrhoea and/or reduced weight gain. The cause of coccidiosis is the protozoan parasite, *Eimeria*, which infects the gut epithelium and destroys the cells. Coccidiosis can have a major economic impact, especially if many animals in the flock are affected.

Answers from this questionnaire will give us a better understanding of how we are treating coccidiosis in Norway, and whether the efficacy is as expected. Based on information obtained from this questionnaire, we will invite some farmers to participate in a sampling programme during spring 2016, to assess the efficacy of anticoccidial treatment.

We would like to combine the answers obtained in this questionnaire with data in the Norwegian Sheep Recording System, and we therefore ask your permission to access your data. All data and answers will be handled anonymously.

If you are keeping sheep both housed and outdoors, we would like you to let us know the proportion of your sheep that are housed.

The questionnaire should take 5-10 minutes to complete. All farmers completing the questionnaire will be entered into a draw with the possibility of winning a tablet computer.

Thank you for your participation!

### 1. Are you a member of the Norwegian sheep recording system?

(Only one answer)

Yes

No

### 2. Farm number (10 digits):

-----

### 3. Number of winter-fed sheep (ewes >one year at Jan 1st):

-----

**4. Which breeds do you keep? (Specify the percentage of each breed, the total should be 100%)**

Norwegian White \_\_\_\_\_ %

Norwegian White Short Tail \_\_\_\_\_ %

Norwegian Coloured Short Tail \_\_\_\_\_ %

Old Norwegian Short Tail \_\_\_\_\_ %

Old Norwegian Sheep \_\_\_\_\_ %

Other \_\_\_\_\_ %

**5. Do you have regular health visits from a veterinarian?**

**(Only one answer)**

Yes

No

**6. Do you have organic production?**

**(Only one answer)**

Yes

No

**7. Duration of the lambing period in your flock?**

**(Only one answer)**

0-14 days

14-27 days

28-41 days

42-55 days

More than 55 days

**8. How are your lambs housed before turnout to pasture?**

**(Only one answer)**

- Slatted floor: plastic, wood or expanded metal
- Solid floor with straw or wood shavings
- Sheep are outside all year round
- Housed at night, outside at day

Other

-----

**Section A, for farmers answering “Sheep are outside all year round” at question 8.**

**9. Have you submitted faecal samples from your lambs to a veterinary diagnostic laboratory during the last two years?**

**(Only one answer)**

- Yes
- No

**10. When were the samples taken?**

- Before/at lambing
- Spring pasture
- Summer pasture
- Autumn pasture

**11. Why were the samples taken?**

- Clinical disease
- Reduced growth
- General surveillance
- To evaluate the need for treatment in otherwise healthy animals

Other

-----

**12. Which parasites do you consider important in your flock:**

**(Only one answer per parasite)**

|                       | Important                | Not important            | Uncertain                |
|-----------------------|--------------------------|--------------------------|--------------------------|
| <i>Ixodes ricinus</i> | <input type="checkbox"/> | <input type="checkbox"/> | <input type="checkbox"/> |
| Lice                  | <input type="checkbox"/> | <input type="checkbox"/> | <input type="checkbox"/> |

|                                 |                          |                          |                          |
|---------------------------------|--------------------------|--------------------------|--------------------------|
| <i>Fasciola hepatica</i>        | <input type="checkbox"/> | <input type="checkbox"/> | <input type="checkbox"/> |
| <i>Dicrocoelium dendriticum</i> | <input type="checkbox"/> | <input type="checkbox"/> | <input type="checkbox"/> |
| <i>Nematodirus battus</i>       | <input type="checkbox"/> | <input type="checkbox"/> | <input type="checkbox"/> |
| Other nematodes                 | <input type="checkbox"/> | <input type="checkbox"/> | <input type="checkbox"/> |
| Tapeworms                       | <input type="checkbox"/> | <input type="checkbox"/> | <input type="checkbox"/> |
| Lung worm                       | <input type="checkbox"/> | <input type="checkbox"/> | <input type="checkbox"/> |
| Coccidia                        | <input type="checkbox"/> | <input type="checkbox"/> | <input type="checkbox"/> |

**13. Have you seen diarrhoea/perineal soiling or reduced weight gain in lambs up to 8 weeks old?**

**(Only one answer per row)**

|                                   | In 0-20%                 | In 20-40%                | In 40-60%                | In 60-80%                | In 80-100%               | Not seen                 |
|-----------------------------------|--------------------------|--------------------------|--------------------------|--------------------------|--------------------------|--------------------------|
| Diarrhoea/<br>perineal<br>soiling | <input type="checkbox"/> | <input type="checkbox"/> | <input type="checkbox"/> | <input type="checkbox"/> | <input type="checkbox"/> | <input type="checkbox"/> |
| Reduced<br>weight gain            | <input type="checkbox"/> | <input type="checkbox"/> | <input type="checkbox"/> | <input type="checkbox"/> | <input type="checkbox"/> | <input type="checkbox"/> |

**14. Do you treat against coccidiosis, and for how long have you treated?**

**(Only one answer)**

- No, have never treated
- Yes, but do not treat every year
- Yes, have treated annually for 1-4 years
- Yes, have treated annually for 5-9 years
- Yes, have treated annually for 10 or more years

**15. Which preparation did you use in 2015?**

- Baycox® Sheep vet
- Vecoxan® vet

Sulpha-preparations

Other

-----

**16. For how long have you used the same preparation?**

**(Only one answer)**

1 year

2-5 years

5-10 years

More than 10 years

**17. How and why do you treat?**

To prevent clinical coccidiosis: flock has never had clinical coccidiosis previously

To prevent clinical coccidiosis; flock has had clinical coccidiosis previously

Treatment of clinical coccidiosis

Other

-----

**18. When do you treat against coccidiosis?**

All lambs are treated before they are two weeks old

All lambs are treated before they are two - four weeks old

All lambs are treated when they are older than four weeks

Individual lambs are treated if needed, e.g. if they have diarrhoea

All lambs are treated when some individual lambs have diarrhoea

All lambs are treated regularly, e.g. at every change of pasture

Only bottle fed lambs are treated

Other

-----

**19. How many times did you treat the whole flock this spring?**

Once

Twice

More than twice

Only some individual lambs were treated more than once (not the whole flock)

No lambs were treated more than once

**20. How do you estimate the dose?**

**(Only one answer)**

Individual weighing

Weighing of medium-sized/average lamb

Weighing of heaviest lamb

Visual appraisal

Other

-----

**21. How often do you check that your drench gun gives the correct dose?**

**(Only one answer)**

Less than once a year

Once a year

Twice a year



> twice a year

Never

**22. Have your lambs ever experienced clinical disease/diarrhoea because of what you think is coccidia, even though the lambs have been treated with an anticoccidial?**

**(Only one answer)**

Yes

No

**23. Do you treat adult sheep against coccidiosis?**

**(Only one answer)**

Yes

No

**24. Why do you treat adult sheep against coccidiosis?**

Diarrhoea during the housed (winter) period

Diarrhoea in the spring pasture period

Low body condition score

Other

-----

**25. When do you treat adult sheep against coccidiosis?**

At lambing

At turnout

When the ewes and lambs are sent to mountain/forest pastures

Other

-----

**26. Who are your advisors regarding treatments against parasitic diseases?**

**(Only one answer per row)**

|                               | Not important            | Somewhat important       | Either or                | Important                | The most important       |
|-------------------------------|--------------------------|--------------------------|--------------------------|--------------------------|--------------------------|
| Articles in farmers' journals | <input type="checkbox"/> | <input type="checkbox"/> | <input type="checkbox"/> | <input type="checkbox"/> | <input type="checkbox"/> |
| Internet                      | <input type="checkbox"/> | <input type="checkbox"/> | <input type="checkbox"/> | <input type="checkbox"/> | <input type="checkbox"/> |
| Other farmers                 | <input type="checkbox"/> | <input type="checkbox"/> | <input type="checkbox"/> | <input type="checkbox"/> | <input type="checkbox"/> |
| Close family                  | <input type="checkbox"/> | <input type="checkbox"/> | <input type="checkbox"/> | <input type="checkbox"/> | <input type="checkbox"/> |
| Abattoir adviser              | <input type="checkbox"/> | <input type="checkbox"/> | <input type="checkbox"/> | <input type="checkbox"/> | <input type="checkbox"/> |
| Veterinarians                 | <input type="checkbox"/> | <input type="checkbox"/> | <input type="checkbox"/> | <input type="checkbox"/> | <input type="checkbox"/> |

**27. Are you interested in participating in this project? Participation includes faecal sampling of lambs and analysis without cost. The analysis will be especially concerned with coccidia and the efficacy of treatment. If you are interested in participating, we might contact you during winter 2016.**

**(Only one answer)**

Yes

No

**28. Thank you for participating! If we need further information, we would like to have your address, email address, telephone number and farm number.**

-----

**29. Other comments?**

-----

**Section B, for farmers NOT answering “Sheep are outside all year round” at question 8.**

**30. Average lamb age at turnout spring 2015?**

**(Only one answer)**

- 0-7 days
- 8-14 days
- 15-21 days
- 21-28 days
- 29 days or older

**31. Average spring pasture period for ewes and lambs?**

**(Only one answer)**

- 0-7 days
- 8-14 days
- 15-24 days
- 22-28 days
- 29-35 days
- More than 35 days

**32. Which type of pasture was used for spring pasturing?**

**(Only one answer)**

- Cultivated pastures
- Uncultivated pastures
- Direct turn out to mountain/forest pastures

Other

-----

**33. Which type of pasture did the majority of your sheep graze during summer?**

**(Only one answer)**

- Cultivated pastures
- Uncultivated pastures
- Mountain/forest pasture
- They were housed

Other

-----

**34. What type of pasture/housing did most of your ewes have during autumn?**

**(Only one answer)**

- Cultivated pastures
- Uncultivated pastures
- Mountain/forest pasture
- Housed

Other

-----

**35. What type of pasture/housing did most of your lambs have during autumn?**

**(Only one answer)**

- Cultivated pastures
- Uncultivated pastures
- Mountain/forest pasture
- Direct housing after weaning

Other

-----

**36. What type of pasture/housing did the majority of your ewes have during winter?**

**(Only one answer)**

- Cultivated pastures
- Uncultivated pastures
- Housed
- Housed, with access to an outdoor pen

Other

-----

**37. Did you use spring pastures that had not been used during the previous spring?**

**(Only one answer)**

- Yes
- No
- Both

**38. Did you use spring pastures that had not been used during the previous autumn?**

**(Only one answer)**

- Yes
- No
- Both

**39. Have you submitted faecal samples for parasitological analysis during the last two years?**

**(Only one answer)**

- Yes
- No

**40. When were the samples taken?**

- At turnout

- On spring pasture
- On summer pasture
- On autumn pasture
- At housing

**41. Why were the samples submitted?**

- Disease
- Reduced growth
- General surveillance
- To assess treatment needs

Other

-----

**Parasites**

**42. Which parasites do you consider important in your flock:  
(Only one answer per parasite)**

|                                 | Important                | Not important            | Uncertain                |
|---------------------------------|--------------------------|--------------------------|--------------------------|
| <i>Ixodes ricinus</i>           | <input type="checkbox"/> | <input type="checkbox"/> | <input type="checkbox"/> |
| Lice                            | <input type="checkbox"/> | <input type="checkbox"/> | <input type="checkbox"/> |
| <i>Fasciola hepatica</i>        | <input type="checkbox"/> | <input type="checkbox"/> | <input type="checkbox"/> |
| <i>Dicrocoelium dendriticum</i> | <input type="checkbox"/> | <input type="checkbox"/> | <input type="checkbox"/> |
| <i>Nematodirus battus</i>       | <input type="checkbox"/> | <input type="checkbox"/> | <input type="checkbox"/> |
| Other nematodes                 | <input type="checkbox"/> | <input type="checkbox"/> | <input type="checkbox"/> |
| Tapeworms                       | <input type="checkbox"/> | <input type="checkbox"/> | <input type="checkbox"/> |

|           |                          |                          |                          |
|-----------|--------------------------|--------------------------|--------------------------|
| Lung worm | <input type="checkbox"/> | <input type="checkbox"/> | <input type="checkbox"/> |
| Coccidia  | <input type="checkbox"/> | <input type="checkbox"/> | <input type="checkbox"/> |

### Coccidiosis

**43. Have you noticed diarrhoea/perineal soiling or reduced weight gain in lambs in the housed period this spring (2015)?**

**(Only one answer per row)**

|                                   | In 0-20%                 | In 20-40%                | In 40-60%                | In 60-80%                | In 80-100%               | Not seen                 |
|-----------------------------------|--------------------------|--------------------------|--------------------------|--------------------------|--------------------------|--------------------------|
| Diarrhoea/<br>perineal<br>soiling | <input type="checkbox"/> | <input type="checkbox"/> | <input type="checkbox"/> | <input type="checkbox"/> | <input type="checkbox"/> | <input type="checkbox"/> |
| Reduced<br>weight gain            | <input type="checkbox"/> | <input type="checkbox"/> | <input type="checkbox"/> | <input type="checkbox"/> | <input type="checkbox"/> | <input type="checkbox"/> |

**44. Have you seen diarrhoea/perineal soiling or reduced weight gain in lambs 2 to 6 weeks after turnout this spring (2015)?**

**(Only one answer per row)**

|                                   | In 0-20%                 | In 20-40%                | In 40-60%                | In 60-80%                | In 80-100%               | Not seen                 |
|-----------------------------------|--------------------------|--------------------------|--------------------------|--------------------------|--------------------------|--------------------------|
| Diarrhoea/<br>perineal<br>soiling | <input type="checkbox"/> | <input type="checkbox"/> | <input type="checkbox"/> | <input type="checkbox"/> | <input type="checkbox"/> | <input type="checkbox"/> |
| Reduced<br>weight gain            | <input type="checkbox"/> | <input type="checkbox"/> | <input type="checkbox"/> | <input type="checkbox"/> | <input type="checkbox"/> | <input type="checkbox"/> |

**45. Do you treat against coccidiosis, and for how long have you treated?**

**(Only one answer)**

- No, have never treated
- Yes, but do not treat every year
- Yes, have treated annually for 1-4 years
- Yes, have treated annually for 5-9 years
- Yes, have treated annually for 10 or more years

**46. Which preparation did you use in 2015?**

Baycox® Sheep vet

Vecoxan® vet

Sulpha-preparations

Other

-----

#### 47. For how long have you used the same preparation?

(Only one answer)

1 year

2-5 years

5-10 years

More than 10 years

#### 48. How and why do you treat?

To prevent clinical coccidiosis; flock has never had clinical coccidiosis previously

To prevent clinical coccidiosis; flock has had clinical coccidiosis previously

Treatment of clinical coccidiosis

Other

-----

#### 49. When did you treat?

All lambs at turnout

All lambs 7-10 days after turnout



- Individual lambs if needed, e.g. diarrhoea
- All lambs are treated when one lamb shows clinical signs
- All lambs are treated regularly, e.g. at each pasture change
- Only bottle fed are treated

Other

-----

**50. How many times did you treat the whole flock this spring?**

- Once
- Twice
- More than twice
- Only some individual lambs were treated more than once
- No lambs were treated more than once

**51. How do you estimate the dose?**

**(Only one answer)**

- Individual weighings
- Weighing of medium-sized/average lamb
- Weighing of heaviest lamb
- Visual appraisal

Other

-----

**52. How often do you check that your drench gun gives the correct dose of anticoccidial?**

**(Only one answer)**

- Less than once a year

- Once a year
- Twice a year
- > twice a year
- Never

**53. Have sheep in your flock ever experienced clinical disease/diarrhoea because of what you think is coccidia, even though the lambs have been treated with an anticoccidial?**

**(Only one answer)**

- Yes
- No

**54. Do you treat adult sheep against coccidiosis?**

**(Only one answer)**

- Yes
- No

**55. Why do you treat adult sheep against coccidiosis?**

- Diarrhoea in the housed period
- Diarrhoea in the spring pasture period
- Low body condition score

Other

-----

**56. When do you treat adult sheep against coccidiosis?**

- At lambing
- At turnout
- When the ewes and lambs are sent to mountain/forest pastures

Other

-----

**Advisors**

**57. Who are your advisors regarding treatments against parasitosis?**

**(Only one answer per row)**

|                               | Not important            | Somewhat important       | Either or                | Important                | The most important       |
|-------------------------------|--------------------------|--------------------------|--------------------------|--------------------------|--------------------------|
| Articles in farmers' journals | <input type="checkbox"/> | <input type="checkbox"/> | <input type="checkbox"/> | <input type="checkbox"/> | <input type="checkbox"/> |
| Internet                      | <input type="checkbox"/> | <input type="checkbox"/> | <input type="checkbox"/> | <input type="checkbox"/> | <input type="checkbox"/> |
| Other farmers                 | <input type="checkbox"/> | <input type="checkbox"/> | <input type="checkbox"/> | <input type="checkbox"/> | <input type="checkbox"/> |
| Close family                  | <input type="checkbox"/> | <input type="checkbox"/> | <input type="checkbox"/> | <input type="checkbox"/> | <input type="checkbox"/> |
| Abattoir adviser              | <input type="checkbox"/> | <input type="checkbox"/> | <input type="checkbox"/> | <input type="checkbox"/> | <input type="checkbox"/> |
| Veterinarians                 | <input type="checkbox"/> | <input type="checkbox"/> | <input type="checkbox"/> | <input type="checkbox"/> | <input type="checkbox"/> |

**58. Are you interested in participating in this project during spring 2016; participation involves faecal sampling from lambs?**

**(Only one answer)**

Yes

No

**59. Thank you for participating. Please record your name, address, email address, and telephone number.**

-----

**60. Do you have any final comments?**

-----
